# Supplementary material for: Modular amphiphilic copolymer-grafted nanoparticles: “nanoparticle micelle” behavior enhances utility as dispersants
Source: Royal Society of Chemistry journal article supplement (doi:10.1039/c5py01251a), 2015-01-01
Supplement: c5py01251a1.pdf [file c5py01251a1.pdf]

## Supporting Information

# Modular amphiphilic copolymer-grafted nanoparticles: “nanoparticle micelle” behavior enhances utility as dispersants

Muhammad Ejaz,<sup>a</sup> Alina M. Alb,<sup>b</sup> Karolina A. Kosakowska,<sup>a</sup> and Scott M. Grayson<sup>a,\*</sup>

<sup>a</sup>Tulane University, Chemistry Department, New Orleans, LA, USA

<sup>b</sup>Tulane University, Physics and Engineering Physics Department, New Orleans, LA, USA

\*Address correspondence to: sgrayson@tulane.edu

### TABLE OF CONTENTS:

|                                                                                                                                             |            |
|---------------------------------------------------------------------------------------------------------------------------------------------|------------|
| <b>Experimental</b>                                                                                                                         | <b>S4</b>  |
| Materials & Synthesis                                                                                                                       | S4         |
| Instrumentation details                                                                                                                     | S7         |
| <b>Characterization of the silica nanoparticles</b>                                                                                         | <b>S9</b>  |
| <b>Figure S1.</b> MSD data from DLS experiments for SiO <sub>2</sub> NPs in isopropanol                                                     | S9         |
| <b>General procedure for cleavage of (co)polymers from silica nanoparticles</b>                                                             | <b>S10</b> |
| <b>Characterization of the free PCL, grafted PCL cleaved from SiO<sub>2</sub>NP-PCL, and PCL-PEG cleaved from SiO<sub>2</sub>NP-PCL-PEG</b> | <b>S10</b> |
| <b>Figure S2.</b> SEC: RI data of cleaved and free PCL from SiO <sub>2</sub> NP-PCL                                                         | S11        |
| <b>Figure S3.</b> MALDI TOF-MS spectrum of free PCL                                                                                         | S11        |
| <b>Figure S4.</b> <sup>1</sup> H NMR spectrum of HF treated native silica nanoparticle                                                      | S12        |
| <b>Figure S5.</b> <sup>1</sup> H NMR spectrum of SiO <sub>2</sub> NP-PCL-PEG treated with HF                                                | S13        |
| <b>Figure S6.</b> <sup>1</sup> H NMR Integration of $\alpha$ -hydrogen of cleaved PCL-PEG                                                   | S13        |
|                                                                                                                                             | S1         |

|                                                                                                                                                                                                                                                                                        |            |
|----------------------------------------------------------------------------------------------------------------------------------------------------------------------------------------------------------------------------------------------------------------------------------------|------------|
| <b>Figure S7.</b> $^1\text{H}$ NMR Integration of $\omega$ -hydrogen of cleaved PCL-PEG                                                                                                                                                                                                | S14        |
| <b>Figure S8.</b> $^1\text{H}$ NMR Integration of $\beta,\delta$ -hydrogens of cleaved PCL-PEG                                                                                                                                                                                         | S14        |
| <b>Table S1.</b> TGA-based PCL and PEG $M_n$ estimation                                                                                                                                                                                                                                | S15        |
| <b>Table S2.</b> $^1\text{H}$ NMR-based mass PCL and PEG $M_n$ estimation                                                                                                                                                                                                              | S15        |
| <b>General procedure for basic hydrolysis of <math>\text{SiO}_2\text{NP-PCL-PEG}</math></b>                                                                                                                                                                                            | <b>S18</b> |
| <b>Figure S9.</b> Comparison of $^1\text{H}$ NMR spectra of HF treated $\text{SiO}_2\text{NP-PCL}$ and PCL                                                                                                                                                                             | S16        |
| <b>Figure S10.</b> Comparison of $^1\text{H}$ NMR spectra of $\text{SiO}_2\text{NP-PCL-PEG}$ treated with HF, neat PCL, neat PEG and native nanoparticle HF etch                                                                                                                       | S17        |
| <b>Figure S11.</b> $^1\text{H}$ NMR spectrum of $\text{SiO}_2\text{NP-PCL-PEG}$ treated with NaOH, PCL degradation followed by PEG extraction in $\text{CH}_2\text{Cl}_2$ (no acid quench)                                                                                             | S18        |
| <b>Figure S12.</b> MALDI TOF mass spectrum of $\text{SiO}_2\text{NP-PCL-PEG}$ treated with NaOH, PCL degradation followed by acid quench                                                                                                                                               | S19        |
| <b>Figure S13.</b> $^1\text{H}$ NMR spectrum of $\text{SiO}_2\text{NP-PCL-PEG}$ treated with NaOH, PCL degradation (with acid quench)                                                                                                                                                  | S20        |
| <b>Particle size and stability of the nanoparticles in aqueous solutions</b>                                                                                                                                                                                                           | <b>S20</b> |
| <b>Figure S14.</b> MSD data from DLS experiments for the bare $\text{SiO}_2\text{NP}$ ; the surface-functionalized $\text{SiO}_2\text{NP-GPS}$ ; the hydrophobic, grafted $\text{SiO}_2\text{NP-PCL}$ ; and finally, the amphiphilic copolymer-grafted $\text{SiO}_2\text{NP-PCL-PEG}$ | S21        |
| <b>Table S3.</b> Intensity-averaged $D_h$ values from DLS measurements made on $\text{SiO}_2\text{NP-PCL-PEG}$ dispersed in fresh water, salt water, and water samples from the Gulf of Mexico                                                                                         | S22        |
| <b>Figure S15.</b> PDI (top) and $D_h$ and LS90 LS vs. temperature for $\text{SiO}_2\text{NP-PCL-PEG}$ in sea water                                                                                                                                                                    | S22        |
| <b>Small hydrophobic molecule sequestration by <math>\text{SiO}_2\text{NP-PCL-PEG}</math></b>                                                                                                                                                                                          | <b>S22</b> |

**Figure S16.** MSD data from DLS experiments for SiO<sub>2</sub>NP-PCL-PEG/Hph aqueous mixtures compared to Hph S23

**Figure S17.** UV spectra from pyrene encapsulation for SiO<sub>2</sub>NP-PCL-PEG, SiO<sub>2</sub>NP-2xPCL-PEG, and Corexit (0.1mg mL<sup>-1</sup>) in water S24

**Characterization of HO-PEG-OCH<sub>3</sub> starting material S24**

**Figure S18.** MALDI TOF-MS Spectrum of  $\alpha$ -hydroxy- $\omega$ -methoxy PEG 5000 S25

**Figure S19.** <sup>1</sup>H NMR spectrum of  $\alpha$ -hydroxy- $\omega$ -methoxy PEG 5000 S26

**Figure S20.** <sup>1</sup>H NMR integration of  $\alpha$ -hydroxy- $\omega$ -methoxy PEG 5000 S26

**Figure S21.** <sup>13</sup>C NMR spectrum of  $\alpha$ -hydroxy- $\omega$ -methoxy PEG 5000 S27

**Characterization of HOOC-PEG-OCH<sub>3</sub> product for DCC coupling S27**

**Figure S22.** MALDI TOF-MS Spectrum of  $\alpha$ -carboxy- $\omega$ -methoxy PEG 3360 S27

**Figure S23.** <sup>1</sup>H NMR spectrum of  $\alpha$ -carboxy- $\omega$ -methoxy PEG 3360 S28

**Figure S24.** <sup>1</sup>H NMR integration of  $\alpha$ -carboxy- $\omega$ -methoxy PEG 3360 S28

**Figure S25.** <sup>13</sup>C NMR spectrum of  $\alpha$ -carboxy- $\omega$ -methoxy PEG 3360 S29

Experimental part and additional experiments made for the characterization of the polymers and the nanoparticles at different stages of the synthesis are presented.

## Experimental

**Materials.** Stannous octanoate ( $\text{Sn}(\text{Oct})_2$ , 95%, Sigma-Aldrich), (3-glycidoxypentyl)triethoxysilane (GPS, Gelest), NaOH (97%, Fisher Scientific), polyethylene glycol methyl ether ( $\alpha$ -hydroxy- $\omega$ -methoxy PEG, Sigma-Aldrich), average  $M_n = 5000$  g/mole, Chromium(VI) oxide ( $\text{CrO}_3$ , 99.9%, Sigma-Aldrich),  $\text{H}_2\text{SO}_4$  (95-98 w/w %, Fisher Scientific), 4-(dimethylamino)pyridine (DMAP, 99%, Sigma-Aldrich), N,N'-dicyclohexylcarbodiimide (DCC, 99%, Sigma-Aldrich), 4-heptylphenol (Hph, Sigma-Aldrich), tetrahydrofuran (THF, Sigma-Aldrich), pyrene (Sigma-Aldrich,  $\geq 99.0\%$ ) and all other reagents were used as obtained from commercial sources.  $\epsilon$ -Caprolactone (CL, 99%, Acros Organics) was dried over  $\text{CaH}_2$  and vacuum distilled before polymerization. Silica suspension (IPA-ST-ZL) was provided by Nissan Chemical Industries, LTD and consisted of  $\sim 30$  wt% of colloidal silica particles with an average diameter of  $\sim 100$  nm, in isopropanol. The pristine silica particles were obtained in powdered form from IPA-ST-ZL by centrifugation to collect the particles followed by washing with methanol and finally drying under vacuum overnight at room temperature.

## Synthesis

**“One-pot” immobilization of the epoxysilane coupling agent onto the silica nanoparticles surface and concurrent hydrolysis of the epoxy groups.** The  $\text{SiO}_2$ NPs were treated with GPS by modification of a previously reported method.<sup>1</sup> The isopropanol solvent from the commercial  $\text{SiO}_2$ NPs suspension was replaced with water by a solvent-exchange method. The suspension was diluted with water and centrifuged. The collected  $\text{SiO}_2$ NPs were

then dispersed in water and centrifuged again. This cycle was repeated a total of five times yielding a suspension of SiO<sub>2</sub>NPs in water.

For the surface functionalization, the SiO<sub>2</sub>NPs suspension in water (4.8 g of particles present in 16.0 g of 30 wt% SiO<sub>2</sub>NPs) was added to a round bottom flask with a magnetic stir bar and fitted with a reflux condenser. GPS (5.6 g, 0.02 mol) was added and the resultant reaction mixture was diluted with deionized water to reach a concentration of SiO<sub>2</sub>NPs of approximately 0.2 g mL<sup>-1</sup>. This suspension was sonicated for 15 min, at which point the pH was adjusted to 11 by the addition of a 1 M aqueous NaOH solution. The reaction mixture was then refluxed for 36 h to assure both silanol condensation and subsequent epoxy hydrolysis to yield diol functionalized nanoparticles. After cooling the reaction mixture down to room temperature, the SiO<sub>2</sub>NPs were repeatedly sonicated in neutral water to disperse them in solution and centrifuged for a period of 30 min at 10,000 rpm to isolate from the solvent, until achieving a neutral pH. The removal of any unattached GPS from the diol functionalized nanoparticles was then achieved by successive centrifuging-redispersion cycles in methanol. Finally, the SiO<sub>2</sub>NPs were dried overnight under vacuum at room temperature before pursuing SIROP. After drying, 4.1 g of functionalized nanoparticles were isolated (84% yield based on TGA measurement of 1.2 weight % GPS on SiO<sub>2</sub>NP-GPS).

**SIROP of CL from the diol functionalized silica nanoparticles (SiO<sub>2</sub>NP-OH) to produce SiO<sub>2</sub>NP-PCL.** 2.1 g of SiO<sub>2</sub>NP-OH were dispersed in 60 g of CL (0.526 mol) by sonication in a 100 mL two-neck round bottom flask fitted with a stir bar. After 40 min of Ar purge, 48.00 mg (0.12 mmol) of Sn(Oct)<sub>2</sub> was added to the suspension under Ar flow. The flask was placed in a thermostatic oil bath at 130 °C and the suspension was stirred for 7 h under Ar. The polymer-grafted SiO<sub>2</sub>NPs were isolated from free polymer by repeatedly dispersing in THF (by

sonication), centrifuging, and decanting the THF solution to remove any unbound PCL. The same procedure was followed in the case of the PCL grafting reactions monitored online. After drying under vacuum, 1.8 g of the SiO<sub>2</sub>NP-PCL product was isolated (76 % yield based on TGA measurement of 12.1 weight % PCL on SiO<sub>2</sub>NP-PCL).

**Synthesis of  $\alpha$ -carboxy- $\omega$ -methoxy-PEG (HOOC-PEG-OCH<sub>3</sub>).** The polyethylene glycol (5000 g mol<sup>-1</sup>), bearing one terminal methyl ether and one carboxylic acid functional group, was prepared as follows.<sup>2</sup> In a round-bottom flask, 47.50 g ( $9.50 \times 10^{-3}$  mol, 1 eq.) of  $\alpha$ -hydroxy- $\omega$ -methoxy PEG were dissolved in 310 mL of acetone. Jones reagent (10.60 g of CrO<sub>3</sub> dissolved in 9.20 mL of H<sub>2</sub>SO<sub>4</sub> and 40 mL of water) was added dropwise until the solution maintained a reddish color for ca. 10 min. The mixture was then diluted with 200 mL of water and washed three times with 300 mL of CH<sub>2</sub>Cl<sub>2</sub>. Organic phases were combined, washed three times with water and dried with anhydrous MgSO<sub>4</sub>. The solvent was evaporated and 45.36 g of HOOC-PEG-OCH<sub>3</sub> were obtained (yield 95%). The observed average weight ( $M_n = 3360$  g/ mole) appeared to be slightly reduced, presumably from oxidative scission of the backbone. The reactant (Fig. S18-S21) and final product (Fig. S22-S25) were characterized by <sup>1</sup>H NMR, <sup>13</sup>C NMR and MALDI mass spectra.

**Attachment of HOOC-PEG-OCH<sub>3</sub> on SiO<sub>2</sub>NP-PCL-OH by ester coupling to produce SiO<sub>2</sub>NP-PCL-PEG.** HOOC-PEG-OCH<sub>3</sub> (6.35 g, 1.27 mmol) was dissolved in 45 mL of anhydrous DCM in two-neck round bottom flask under N<sub>2</sub> flow. 1.30 g of SiO<sub>2</sub>NP-PCL-OH suspended by sonication in 45 mL of anhydrous DCM was charged with the above solution of HOOC-PEG-OCH<sub>3</sub> under N<sub>2</sub> flow and the mixture was cooled to 0 °C while stirring. A solution of 790 mg of DCC (3.83 mmol) and 48.50 mg (0.39 mmol) of DMAP was prepared in 12 mL of

DCM and added dropwise to the above reaction mixture over a period of 15 min. After 1 h, the reaction mixture was allowed to warm to room temperature, at which time the stirring was continued for an additional 36 h. The DCC-urea by-product could be removed by selectively centrifugation of the nanoparticles, and decanting off the urea suspended in solution. The resulting particles were cleaned with a series of different solvents (DCM, THF, acetone, water, and methanol) by redispersion/centrifugation and finally vacuum dried overnight. After drying, 1.1 g of functionalized nanoparticles were isolated (83 % yield based on TGA measurement of 1.8 weight % PEG on SiO<sub>2</sub>NP-PCL-PEG).

**Synthesis of SiO<sub>2</sub>NP-2xPCL-PEG.** In the first step 0.7 g of SiO<sub>2</sub>NP-PCL were dispersed in 21 g of CL (0.184 mol) by sonication in a 50 mL two-neck round bottom flask fitted with a stir bar. After 40 min of Ar purge, 24.00 mg (0.06 mmol) of Sn(Oct)<sub>2</sub> was added to the suspension under Ar flow. The flask was placed in a thermostatic oil bath at 130 °C and the suspension was stirred for 5 h under Ar. The SiO<sub>2</sub>NP-PCL with OH terminal ends act as immobilized macroinitiators for SIROP of additional CL. The polymer-grafted SiO<sub>2</sub>NP-2xPCL were isolated from free polymer as mentioned above in SIROP of CL from SiO<sub>2</sub>NPs-OH. In the second step SiO<sub>2</sub>NP-2xPCL were attached with HOOC-PEG-OCH<sub>3</sub> by ester coupling using same protocol as mentioned above for attachment of HOOC-PEG-OCH<sub>3</sub> on SiO<sub>2</sub>NP-PCL-OH by ester coupling.

## Characterization

The PCL grafting reactions on the functionalized silica nanoparticles via surface-initiated ring opening polymerization (SIROP) were monitored using Automatic Continuous Online Monitoring of Polymerization reactions (ACOMP),<sup>3</sup> a non-chromatographic method that relies

on continuous extraction and dilution of a small stream of reactor contents on which measurements are simultaneously made by multiple detectors, as the reaction proceeds. A two-stage dilution with tetrahydrofuran (THF) of a small reactor stream was made throughout the reaction using an ensemble of HPLC pumps. Characterization of the amphiphilic SiO<sub>2</sub>NP-PCL-PEG copolymer grafted particles in terms of stability in aqueous media, size, and loading capabilities was made by Automatic Continuous Mixing (ACM).

<sup>4</sup> The technique used a Shimadzu HPLC pump, connected to a mixing unit and a detector train containing multi-angle light scattering (Brookhaven), refractive index and UV detectors (Shimadzu). Particle hydrodynamic diameter,  $D_h$  (the intensity-weighted average diameter) was determined by dynamic light scattering (DLS) measurements made using a Brookhaven 90-plus detector ( $\lambda = 670$  nm) operating at a scattering angle of 90°. <sup>5</sup> Further polymer characterization of the grafted PCL-PEG in terms of molecular weight distribution and polydispersity was made by Size Exclusion Chromatography (SEC), with THF as eluent, at 0.8 mL/min. A SDV linear chromatographic column (100 Å single porosity, 3  $\mu$ m particle size) from Polymer Standards Service and same detectors as in ACM were employed. Molecular weight determination was based on direct measurements from light scattering (LS) data and/or calibration with PCL standards. The Fourier transform infrared (FTIR) spectroscopy was performed using a NEXUS 670 FT-IR SEP. Analyte was mixed with KBr and ground into a fine powder by mortar and pestle and compacted into a pellet by applying pressure. Thermogravimetric analysis (TGA) data was acquired using TA Instruments TGA 2950 Thermogravimetric Analyzer with heating rate of 20 °C per minute under N<sub>2</sub> atmosphere. Data was processed using TA Instruments Universal Analysis software. Transmission electron (TEM) microscopy data was collected with a FEI G2 F30 Tecnai TEM operated at 200 kV. All the samples were suspend in ethanol and casted on the



TEM grid. Chemical shifts are reported in parts per million (ppm) relative to  $\text{CDCl}_3$  (7.26 ppm for  $^1\text{H}$  and 77.36 for  $^{13}\text{C}$ ), as internal reference. MALDI spectra were collected using a Bruker UltraFlex MALDI-TOF MS with a SCOUT-MTP Ion Source (Bruker Daltonics, Bremen),  $\text{N}_2$ -laser (337nm), and reflector design was used. The intensity of the laser was set to the lowest possible level to acquire high resolution spectra of the product and all spectra were acquired using reflector-positive mode. The instrument was calibrated using SpheriCal<sup>TM</sup> calibrants purchased from Polymer Factory Sweden AB. The received spectra were analyzed using the software FlexAnalysis from Bruker Daltonics, Bremen, version 2.2. A Bruker Avance 400 MHz NMR instrument was used for  $^1\text{H}$  NMR and  $^{13}\text{C}$  NMR experiments. Proton NMR spectra were acquired with a spectral window of 20 ppm, an acquisition time of 4 seconds and a relaxation delay of 2 seconds.  $^{13}\text{C}$  NMR spectra were acquired with a spectral window of 250 ppm, an acquisition time of 0.7 seconds and a relaxation delay of 5 seconds.

**Characterization of the silica nanoparticles.** Initial characterization of the commercially available starting material provided by Nissan Chemical Industries, LTD as ~30 wt% of colloidal silica particles in isopropanol was carried out to confirm their well-defined structure.

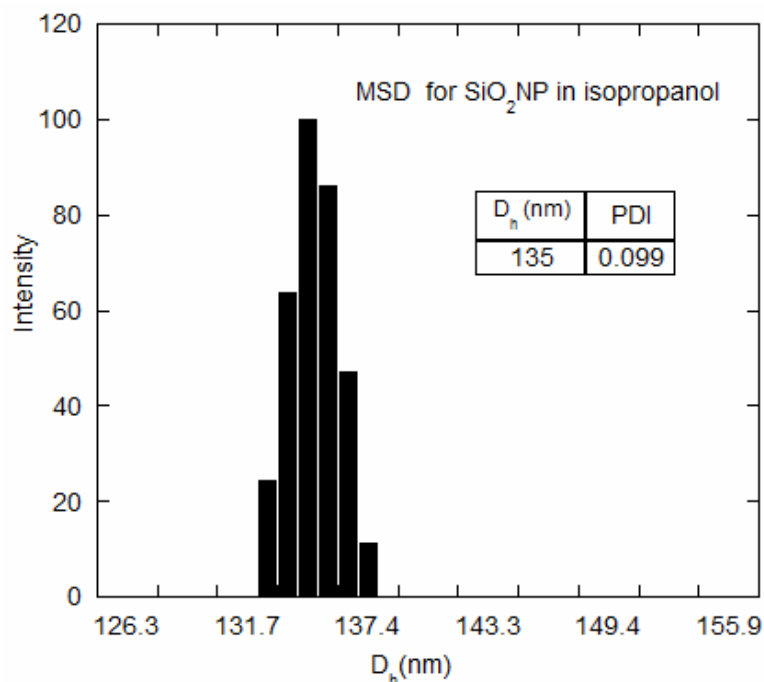

**Figure S1.** MSD data from DLS experiments for SiO<sub>2</sub>NPs in isopropanol.

Results of the DLS measurements made on diluted nanoparticles (SiO<sub>2</sub>NPs) in isopropanol give an average  $D_h$  value of 135 nm and narrow polydispersity (PDI)  $\sim$  0.1, confirming their excellent dispersibility. Figure S1 shows a graphical representation in terms of multimodal size distribution (MSD), based on the non-negatively constrained least squares (NNLS) algorithm used to fit data.<sup>1</sup>

**General procedure for cleavage of (co)polymers from silica nanoparticles.**<sup>6,7</sup> SiO<sub>2</sub>-polymer nanoparticles (100.0 mg) were suspended in 4 mL of toluene or dichloromethane (DCM) in a Teflon flask. Aliquat 336 (phase transfer catalyst, 50.0 mg) and 48% HF (aq) solution (5 mL) were added to the particle suspension and the reaction mixture was allowed to stir at room temperature overnight. The reaction mixture was washed with aqueous NaHCO<sub>3</sub> and

water and organic layer containing polymer was separated. Polymer was recovered by evaporation of solvent.

**Characterization of the free PCL, grafted PCL cleaved from SiO<sub>2</sub>NP-PCL, and grafted PCL-PEG cleaved from SiO<sub>2</sub>NP-PCL-PEG.** Characterization of the free and grafted polymers obtained during SIROP reactions (and subsequently cleaved from the nanoparticles) in terms of molecular weight was conducted by size exclusion chromatography (SEC) in THF, relative to PCL standards (previously synthesized by ROP with each  $M_n$  determined by MALDI). Weight average molecular weight ( $M_w$ ) values of 7400 g/mole and 12,000 g/mole and rather low polydispersity values ( $\sim 1.1$ ) for the free and cleaved PCL, respectively, were determined.

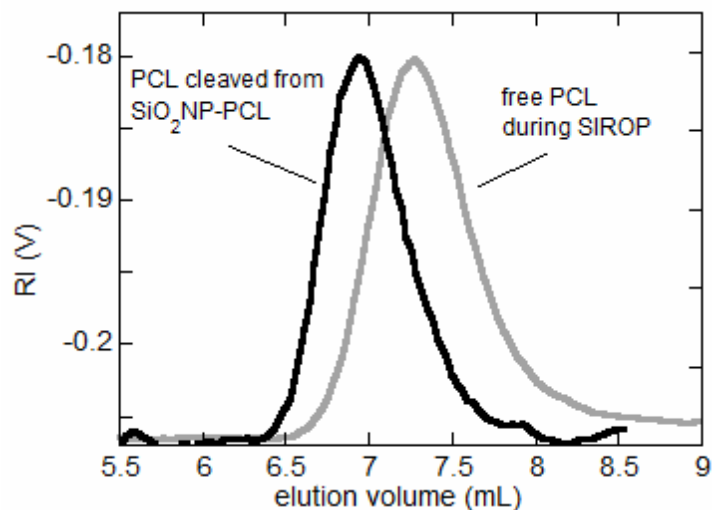

**Figure S2.** SEC: RI data from PCL cleaved from SiO<sub>2</sub>NP-PCL, compared to the free PCL during SIROP led to  $M_n$  values of 11243 ( $\bar{D}$ =1.1806) and 6894 g/mole ( $\bar{D}$ =1.1822) for the cleaved and free PCL, respectively, based on calibration curve with linear PCL

To provide a measure of the accuracy of the molecular weight determination by SEC, MALDI data for the free PCL was also acquired in Figure S3.

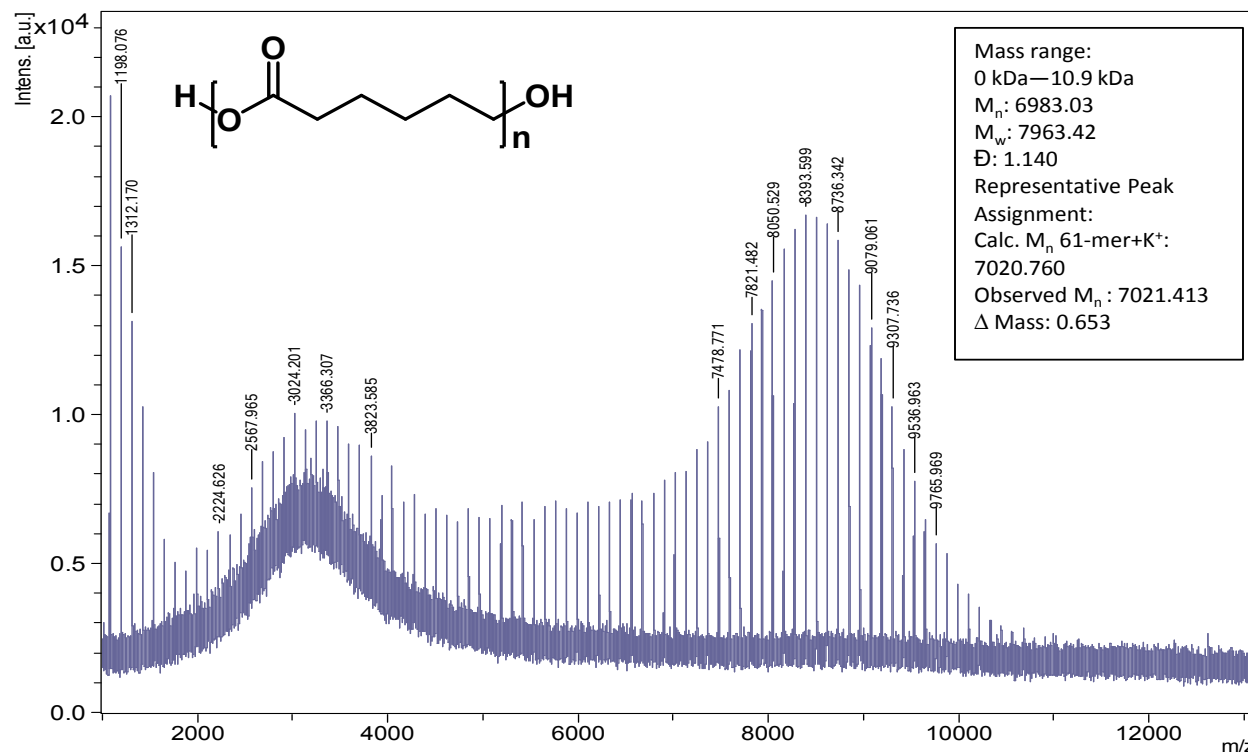

**Figure S3.** MALDI TOF mass spectrum of free PCL. MS conditions: matrix: 2-mercapto-benzothiazole 10 mg mL<sup>-1</sup>, analyte: 20 mg mL<sup>-1</sup>, and added cation: potassium trifluoroacetate 1 mg mL<sup>-1</sup> [7:7:1], calibrated, reflector mode.

In order to quantify the ratio of PEG to PCL, the SiO<sub>2</sub>NP-PCL-PEG were treated with HF to isolate free block copolymer, and the block ratio determined by <sup>1</sup>H NMR (Figures S4-S10).

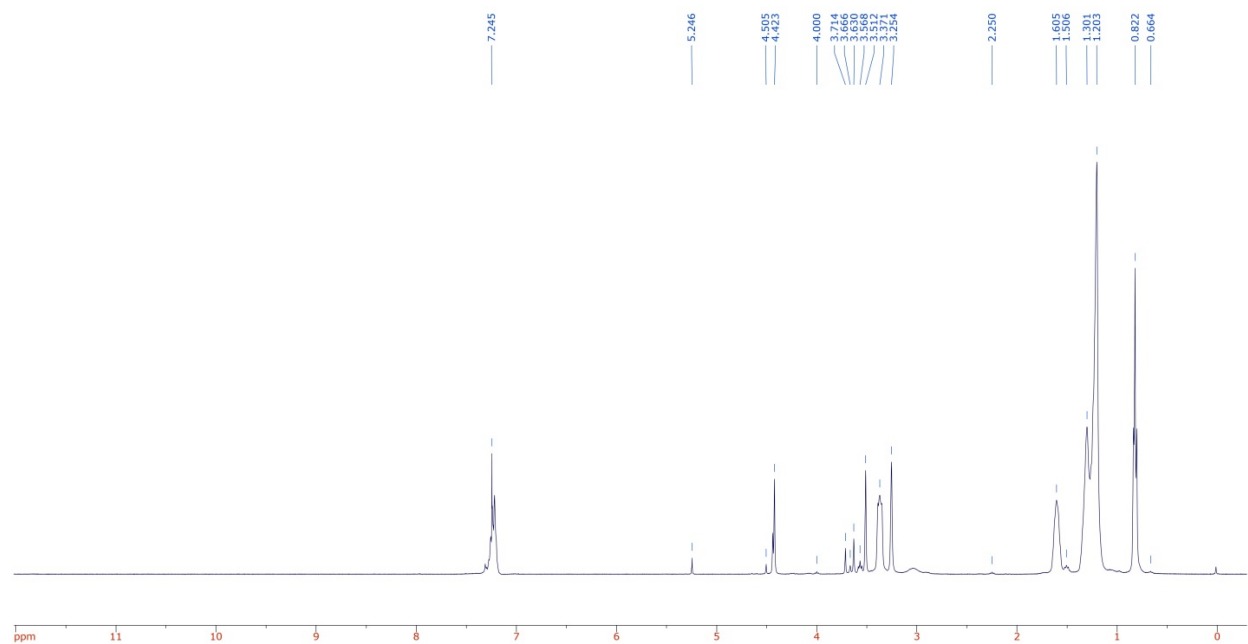

**Figure S4.** <sup>1</sup>H NMR spectrum of product of native silica nanoparticles (without polymer grafting) after treatment with HF/Aliquot 336 catalyst, in CDCl<sub>3</sub>

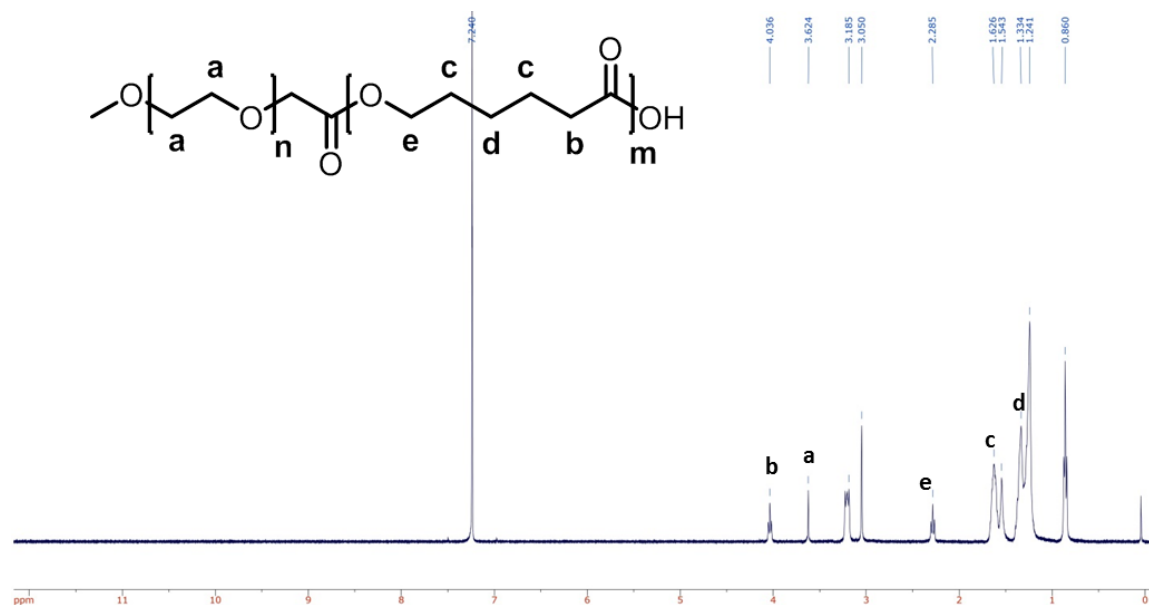

**Figure S5.**  $^1\text{H}$  NMR spectrum in  $\text{CDCl}_3$  of  $\text{SiO}_2\text{NP-PCL-PEG}$  treated with  $\text{HF/Aliquot 336}$ .

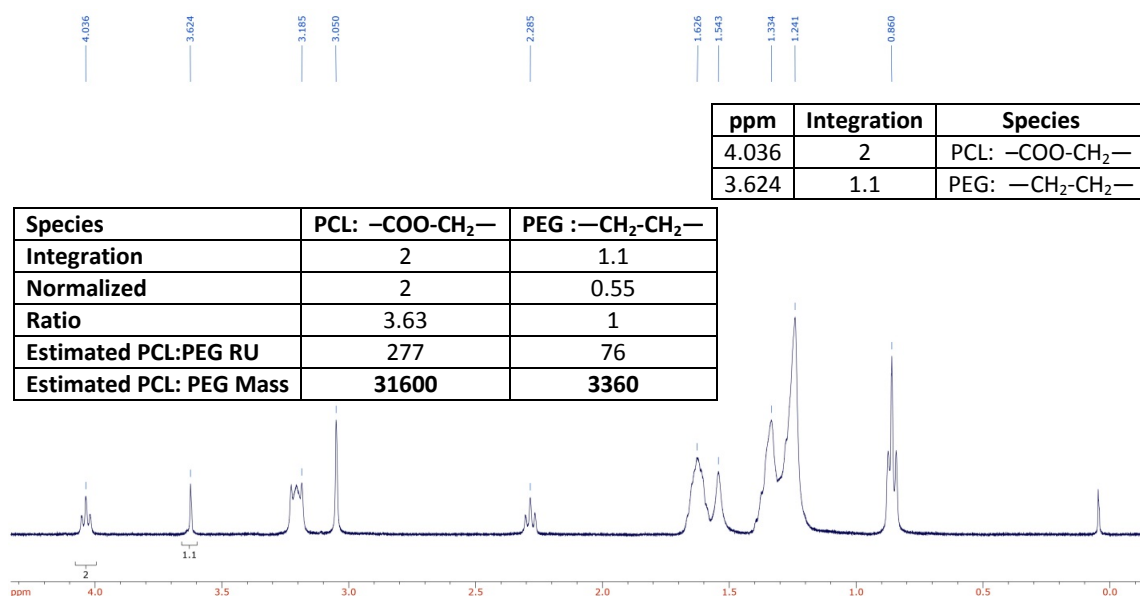

**Figure S6.** Integration of significant peaks from  $^1\text{H}$  NMR spectrum in  $\text{CDCl}_3$  of  $\text{SiO}_2\text{NP-PCL-PEG}$  treated with  $\text{HF/Aliquot 336}$ ; values calculated against PCL ester  $\alpha$ -position hydrogens, and molecular weight estimations based on  $\text{PEG} = 3360$ .

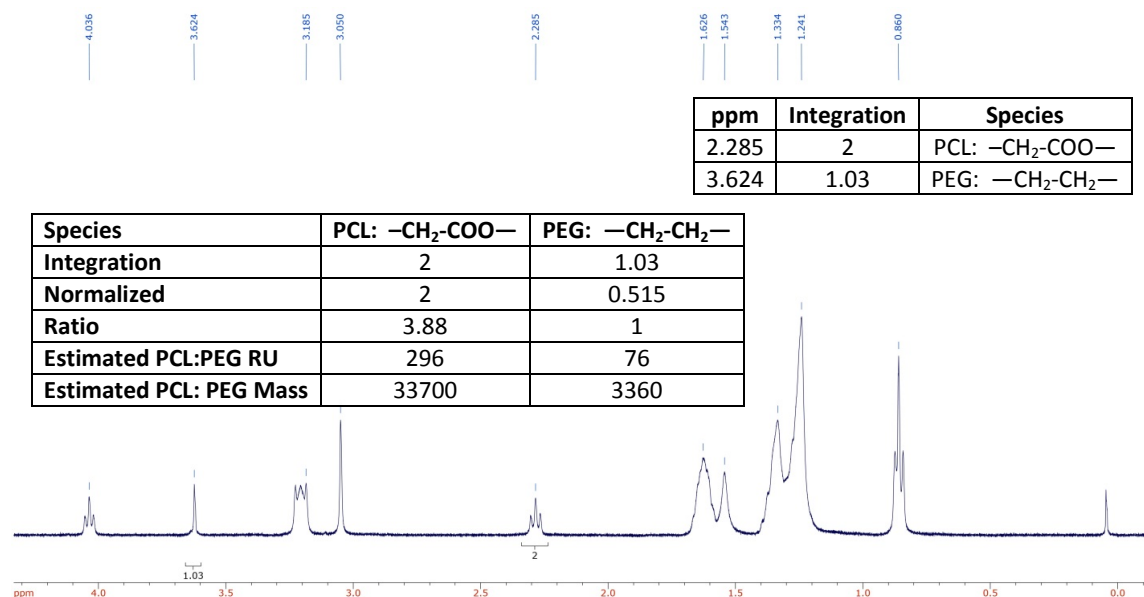

**Figure S7.** Integration of significant peaks from  $^1\text{H}$  NMR spectrum in  $\text{CDCl}_3$  of  $\text{SiO}_2\text{NP-PCL-PEG}$  treated with HF/Aliquot 336; values calculated against ester  $\omega$ -position hydrogens, and molecular weight estimation based on PEG = 3360.

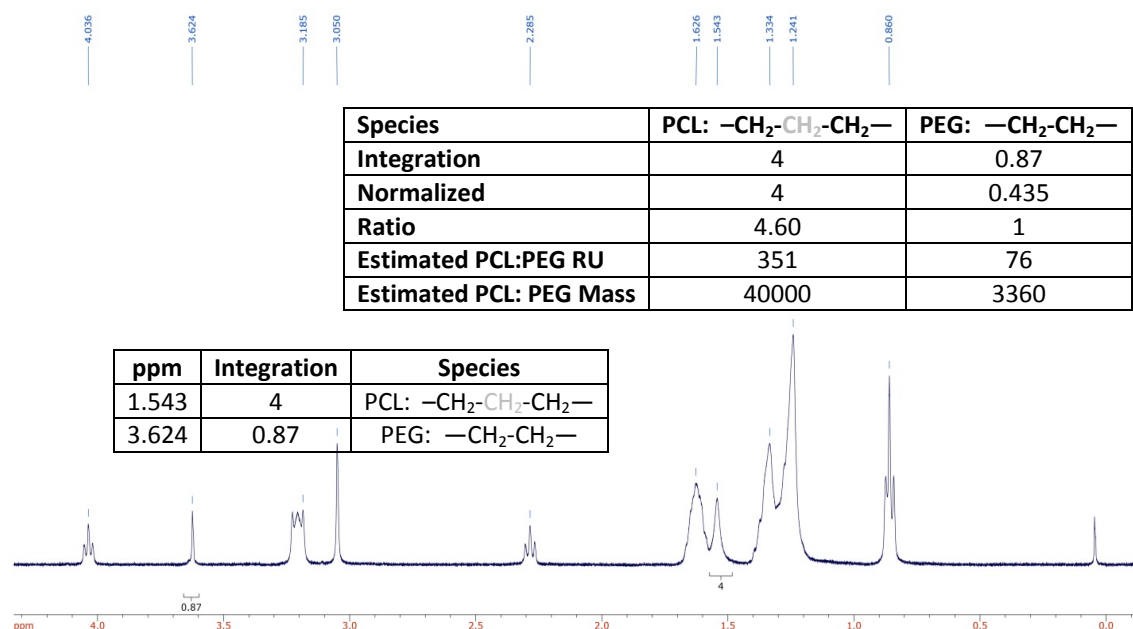

**Figure S8.** Integration of significant peaks from  $^1\text{H}$  NMR spectrum in  $\text{CDCl}_3$  of  $\text{SiO}_2\text{NP-PCL-PEG}$  treated with HF/Aliquot 336; values calculated against ester  $\beta,\delta$ -position hydrogens, and molecular weight estimation based on PEG = 3360.

**Table S1.** TGA relative mass estimation, based on the assumption that PEG  $M_n = 3360$  for SiO<sub>2</sub>NP-PCL-PEG.

| Polymer | Weight Loss (%) | Mass Ratio | Estimated Mass | Estimated Repeat Unit | Repeat Unit Ratio |
|---------|-----------------|------------|----------------|-----------------------|-------------------|
| PCL     | 12.1            | 6.72       | 22600          | 198                   | 2.59              |
| PEG     | 1.8             | 1          | 3360           | 76                    | 1                 |

**Table S2.** <sup>1</sup>H NMR relative mass estimation based on the assumption that PEG  $M_n = 3360$  for SiO<sub>2</sub>NP-PCL-PEG.

| Position        | Ratio PEG:PCL | Calculated PCL Repeat Units | Calculated PCL Mass |
|-----------------|---------------|-----------------------------|---------------------|
| $\alpha$        | 1:3.64        | 277                         | 31600               |
| $\omega$        | 1:3.88        | 296                         | 33700               |
| $\beta, \delta$ | 1:4.60        | 351                         | 40000               |
| <b>Average</b>  | <b>1:4.04</b> | <b>308</b>                  | <b>35100</b>        |

#### General procedure for basic hydrolysis of SiO<sub>2</sub>NP-PCL-PEG



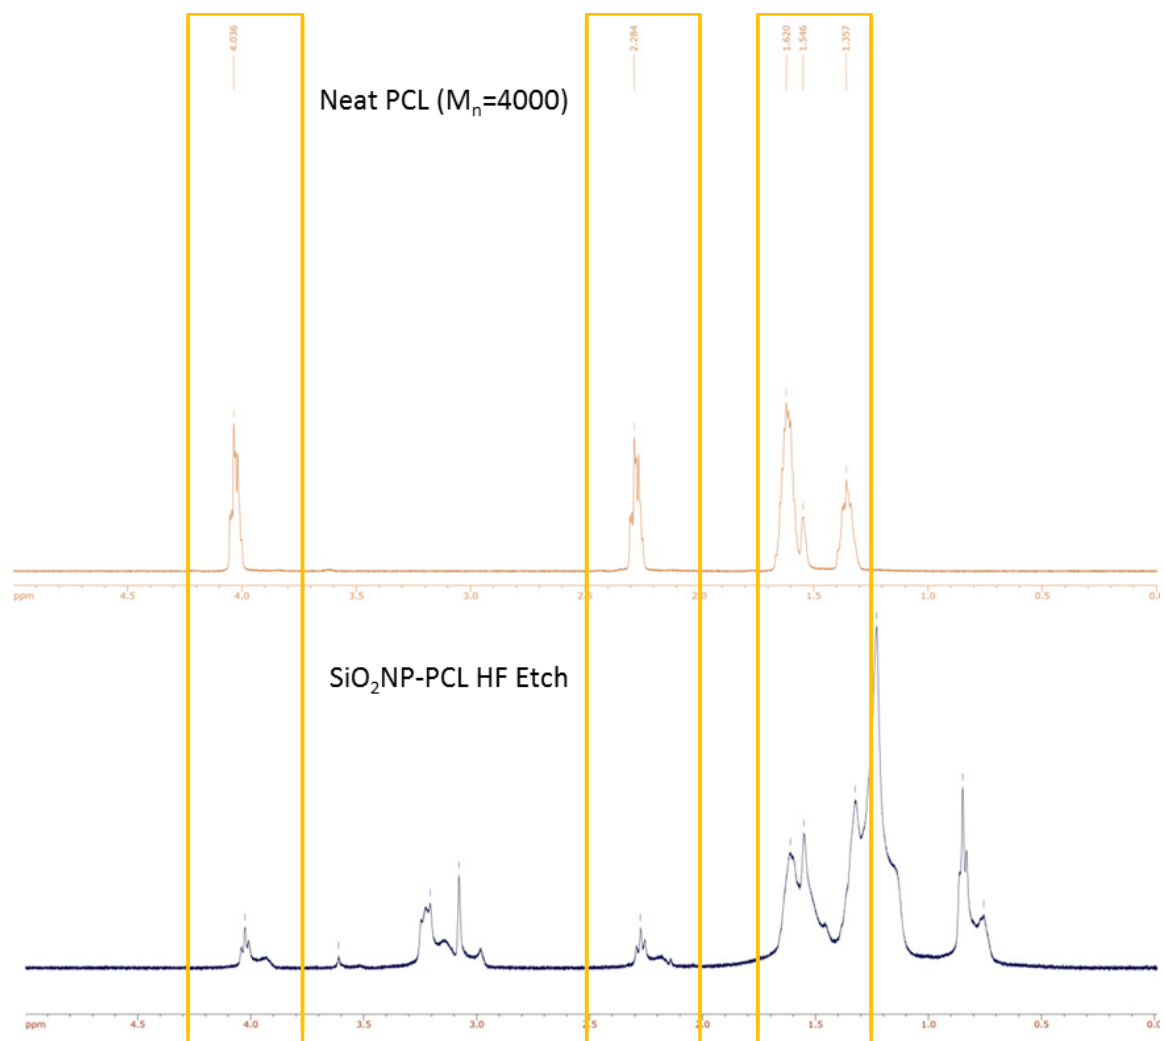

**Figure S9.** <sup>1</sup>H NMR spectrum in CDCl<sub>3</sub> of SiO<sub>2</sub>NP-PCL treated with HF/Aliquot 336; overlay with neat PCL <sup>1</sup>H NMR spectrum to confirm the presence of PCL in the HF treated product.

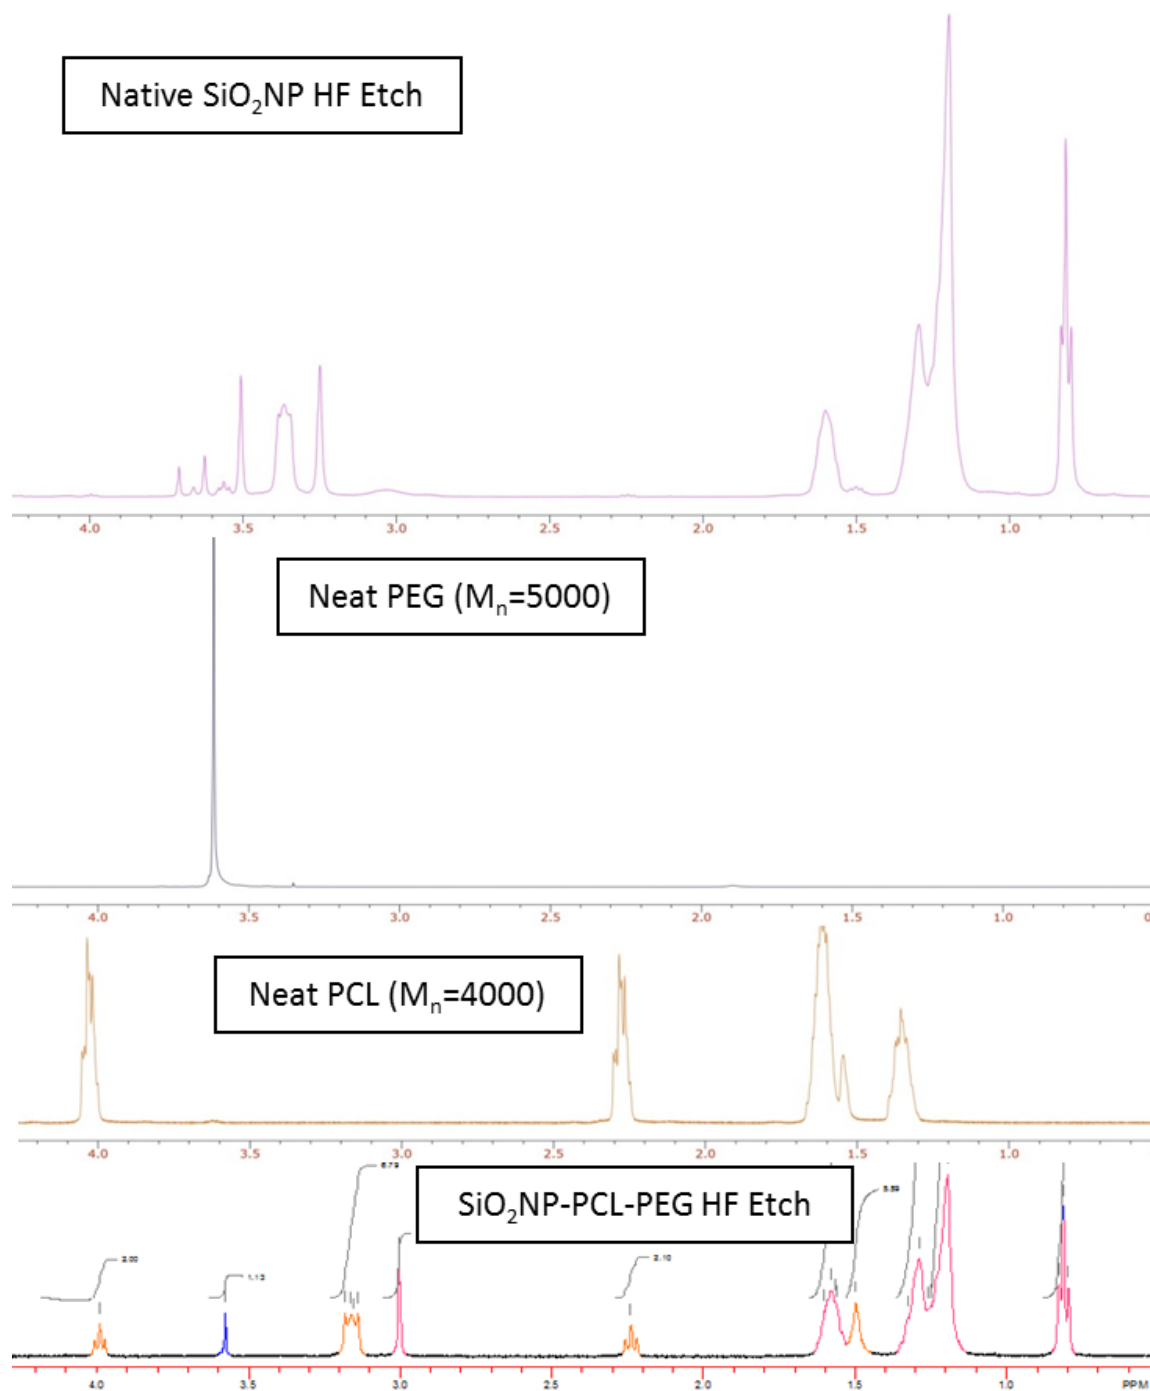

**Figure S10.**  $^1\text{H}$  NMR spectrum of  $\text{SiO}_2\text{NP-PCL-PEG}$  treated with  $\text{HF}$ /Aliquo 336, in  $\text{CDCl}_3$ ; overlay with neat PCL, neat PEG and native  $\text{SiO}_2\text{NP}$  after  $\text{HF}$ /Aliquot 336 etch  $^1\text{H}$  NMR spectra to confirm the assignment of PEG (purple), PCL (orange), and  $\text{SiO}_2\text{NP}$ /aliquot byproducts (pink).

As an additional confirmation of the attachment of PEG, the PEG-PCL functionalized nanoparticles were reacted with  $\text{NaOH}$  to completely degrade the PCL, enabling the PEG (and degraded PCL) to be characterized by NMR and MALDI-ToF MS (Figures S11-S13):

**General procedure for treatment of silica nanoparticles grafted with PCL and PEG with NaOH.** SiO<sub>2</sub>-polymer nanoparticles (50.0 mg) were suspended in 15 mL of THF. 3 mL of 0.01 NaOH (aq) solution was added to the above suspension and reaction mixture was allowed to stir at room temperature for 12 h. At this stage, the reaction mixture could be extracted with CH<sub>2</sub>Cl<sub>2</sub> to isolate the PEG. Alternatively, the reaction could be acidified to neutrality with 1 M HCl and extracted with CHCl<sub>3</sub> in order to isolate PEG along with the degradation product (hydroxyhexanoic acid) of the PDL.

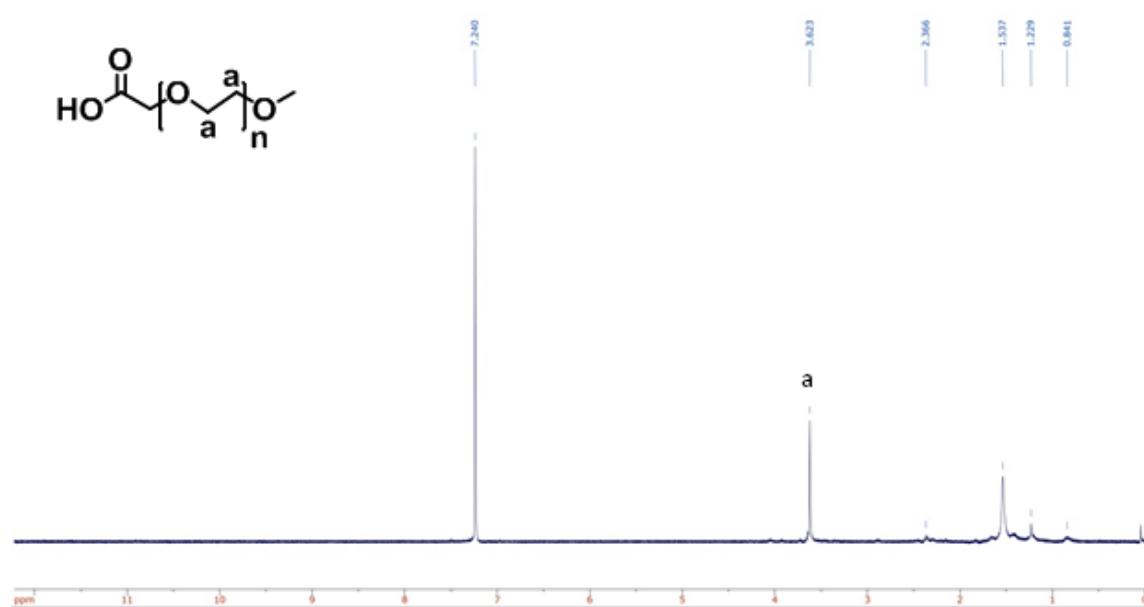

**Figure S11.** <sup>1</sup>H NMR spectrum in CDCl<sub>3</sub> of SiO<sub>2</sub>NP-PCL-PEG treated with NaOH, PCL degradation followed by PEG extraction in CH<sub>2</sub>Cl<sub>2</sub> (no acid quench).

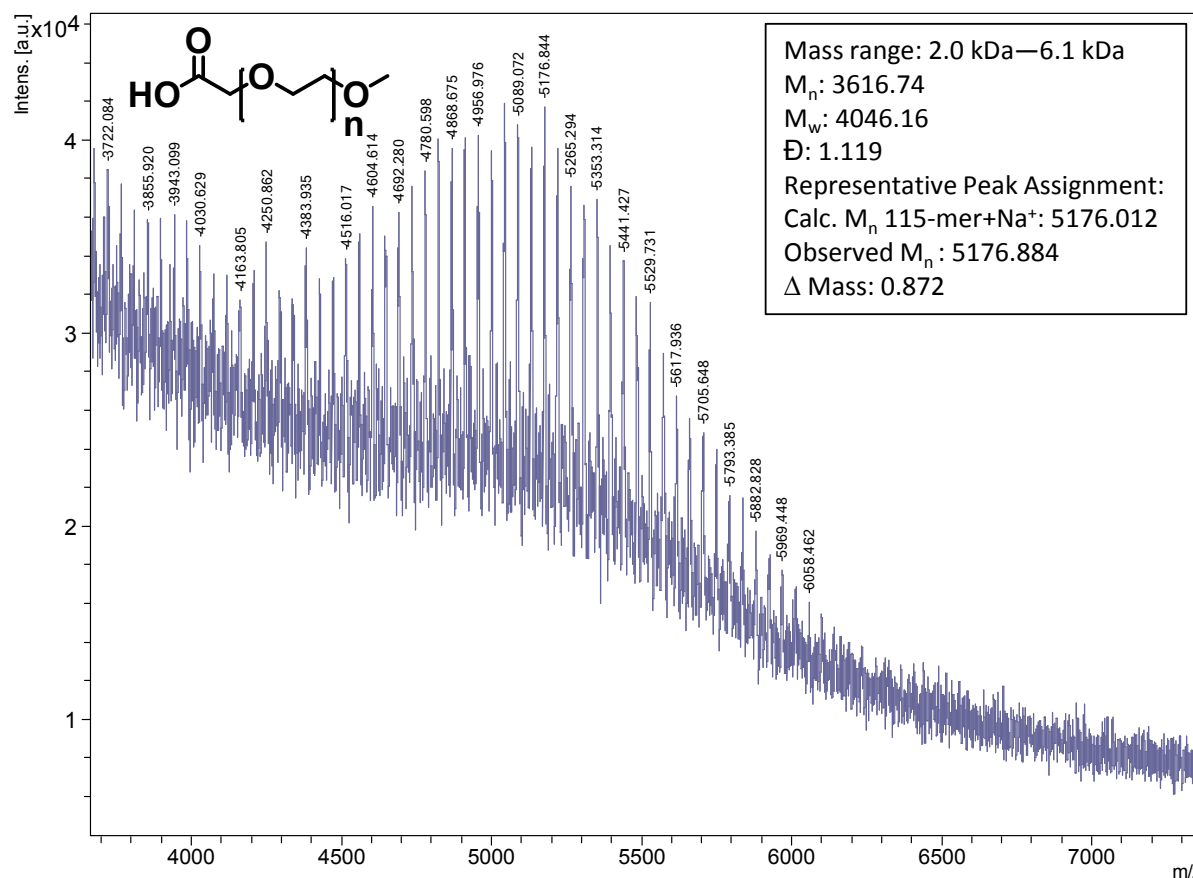

**Figure S12.** MALDI TOF mass spectrum of PEG carboxylic acid, removed from  $\text{SiO}_2\text{NP-PCL-PEG}$  by treatment with  $\text{NaOH}$ , (to achieve PCL degradation) followed by acid quench. MS conditions: matrix: trans-2-[3-(4-*tert*-butylphenyl)-2-methyl-2-propenylidene]malononitrile (DCTB) 20 mg/mL, analyte: 20 mg/mL, and added cation: sodium trifluoroacetate 2 mg  $\text{mL}^{-1}$  [3:2:1], calibrated, reflector mode.

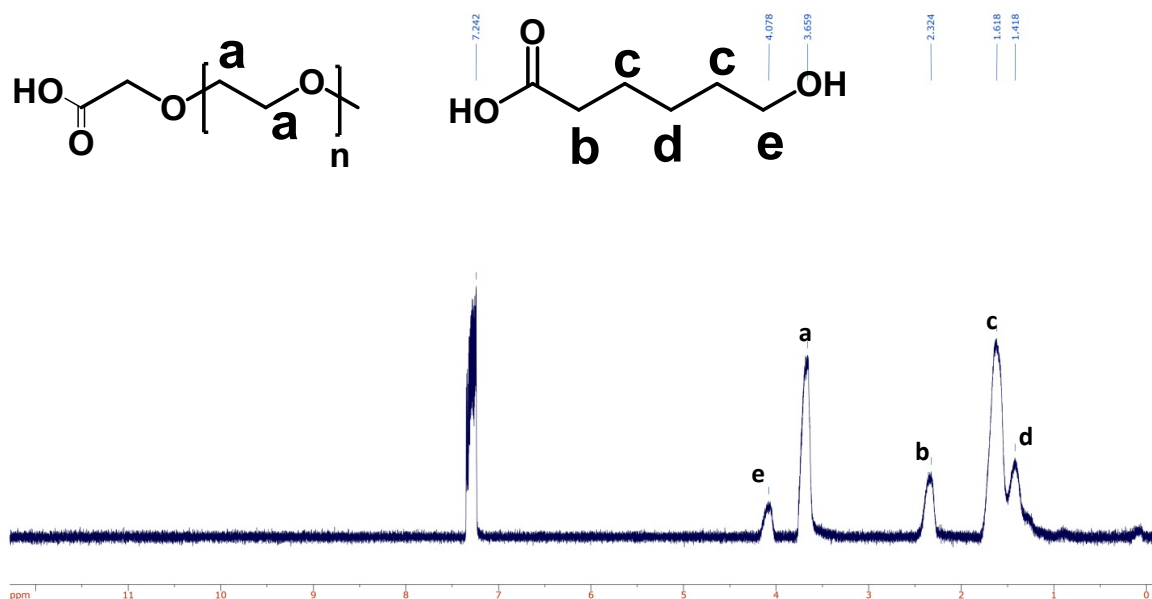

**Figure S13.**  $^1\text{H}$  NMR spectrum in  $\text{CDCl}_3$  of the degraded polymer grafts (hydrolyzed PCL as well as PEG) obtained by treatment of  $\text{SiO}_2\text{NP-PCL-PEG}$  with  $\text{NaOH}$ , PCL degradation, followed with acid quench and extraction into  $\text{CHCl}_3$ .

**Particle size and stability of the nanoparticles in aqueous solutions.** DLS experiments made on aqueous solutions containing nanoparticles at different stages of the synthesis: the bare  $\text{SiO}_2\text{NP}$ , the surface-functionalized  $\text{SiO}_2\text{NP-GPS}$ , the hydrophobic, grafted  $\text{SiO}_2\text{NP-PCL}$ , and the amphiphilic copolymer-grafted  $\text{SiO}_2\text{NP-PCL-PEG}$  confirmed that the nanoparticles were rather stable when dispersed in aqueous media and exhibited homogeneous particle distributions, with the notable exception of the hydrophobic PCL grafted nanoparticles which exhibited limited stability and a tendency to aggregate. An illustration of their behavior is shown in Fig. S19 containing multimodal size distribution (MSD) data for all the above types of nanoparticles in aqueous solutions. The number-weighted distributions are shown in the figure. Data for  $\text{SiO}_2\text{NP-PCL}$  are included only to show the presence of aggregated particles, otherwise not quantitatively meaningful.

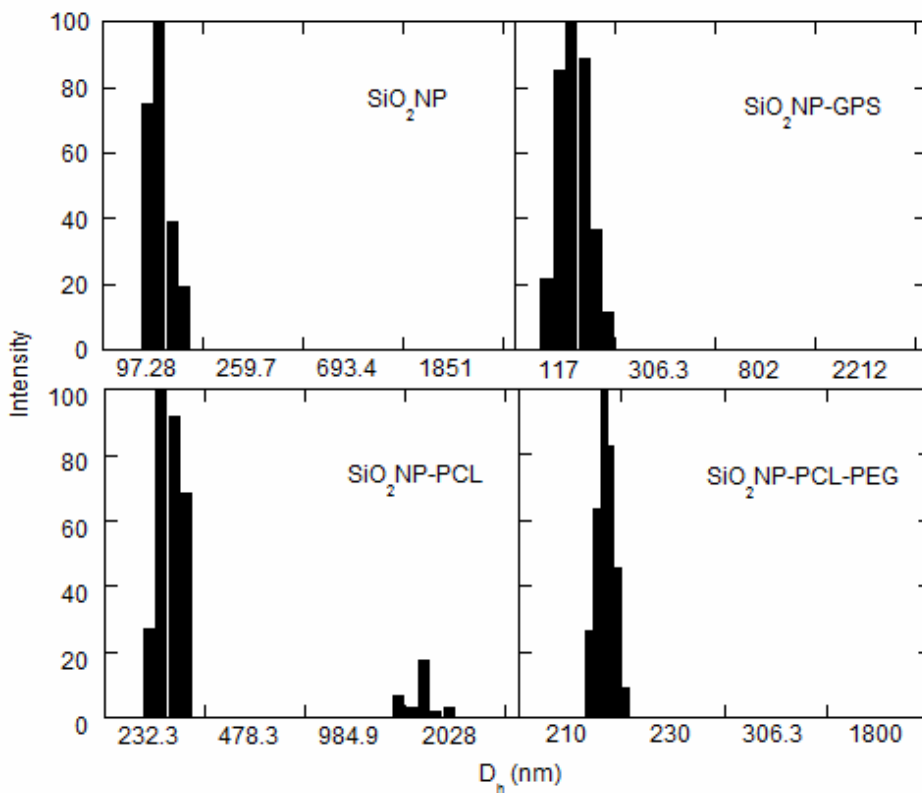

**Figure S14.** MSD data from DLS experiments for SiO<sub>2</sub>NP, SiO<sub>2</sub>NP-GPS, SiO<sub>2</sub>NP-PCL, and SiO<sub>2</sub>NP-PCL-PEG

Results from additional studies shown in Table S3 confirmed that the behavior of the SiO<sub>2</sub>NP-PCL-PEG nanoparticles was not significantly affected by variations of the aqueous media, including fresh water, salt water or water samples extracted from the Gulf of Mexico.

**Table S3.** Intensity-averaged  $D_h$  values from multiple DLS measurements made on aqueous SiO<sub>2</sub>NPs-PCL-PEG dispersed in fresh water, salt water, and in water samples from the Gulf of Mexico

| In water   |       |       | In 0.6 M NaCl |       |       | In sea water |       |       |
|------------|-------|-------|---------------|-------|-------|--------------|-------|-------|
| $D_h$ (nm) | PDI   | LS90  | $D_h$ (nm)    | PDI   | LS90  | $D_h$ (nm)   | PDI   | LS90  |
| 211        | 0.129 | 270.5 | 203           | 0.047 | 235.4 | 232          | 0.210 | 366.1 |

Shown in Figure S15 are PDI (top) and  $D_h$  and LS90° vs. temperature for SiO<sub>2</sub>NP-PCL-PEG in sea water, indicating no significant effect of the temperature on the physical characteristics studied.

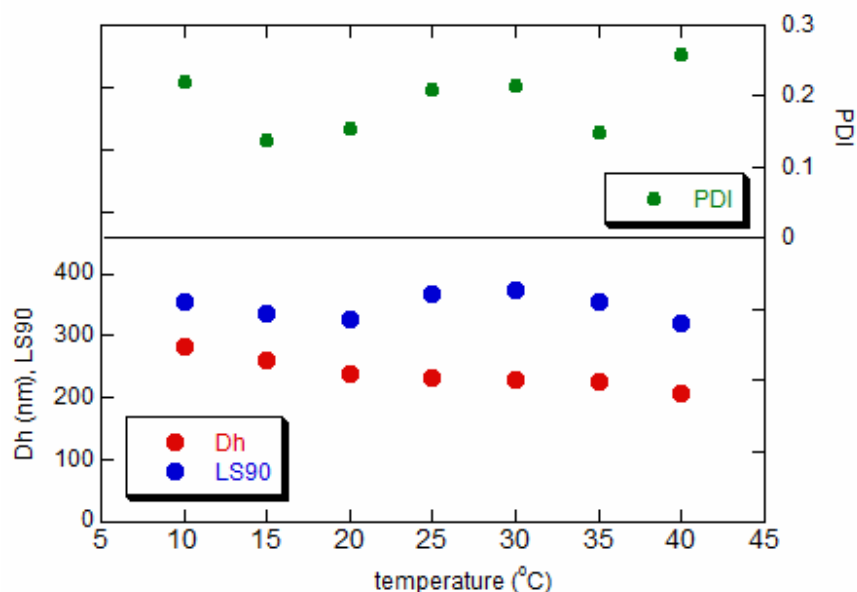

**Figure S15.** PDI (top) and  $D_h$  and LS90° vs. temperature for SiO<sub>2</sub>NP-PCL-PEG in sea water

**Small hydrophobic molecule sequestration by SiO<sub>2</sub>NPs-PCL-PEG copolymer grafted particles.** Additional DLS data – MSD (intensity-weighted distributions) for SiO<sub>2</sub>NP-PCL-PEG/Hph aqueous mixtures compared to data for Hph alone - are shown in Figure S16. Narrow

MSDs for the copolymer nanoparticles & Hph mixture contrasts to the bimodal MSD of the aggregated hydrophobic Hph and confirm, by the disappearance of the clustered particles, the Hph sequestration.

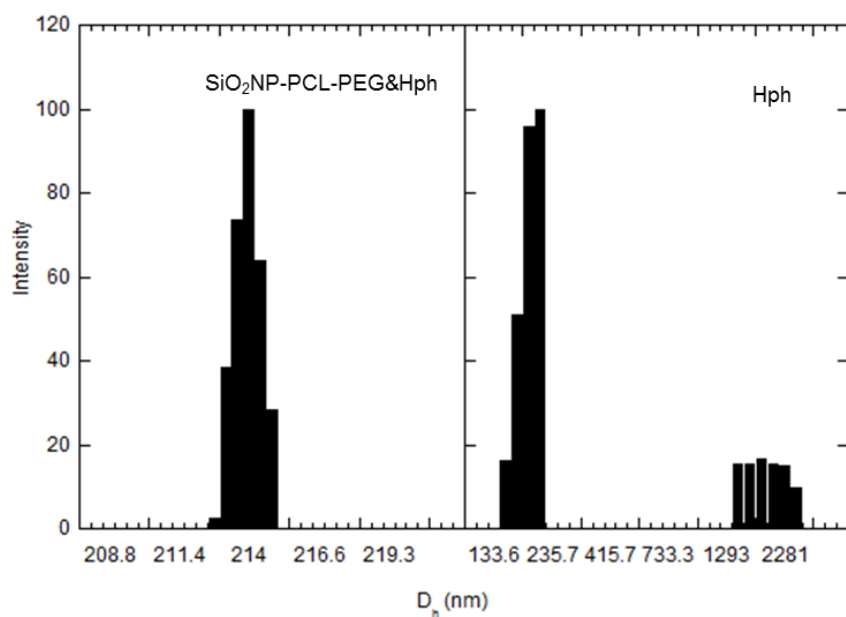

**Figure S16.** MSD data from DLS experiments for SiO<sub>2</sub>NP-PCL-PEG/Hph aqueous mixtures compared to Hph

Discrete UV and fluorescence experiments with pyrene shown in Figure S17 allowed comparing SiO<sub>2</sub>NP-PCL-PEG and Corexit loading capabilities. Excess pyrene was added to the aqueous nanoparticle with different PCL layer and Corexit solutions (0.1 mg mL<sup>-1</sup>) and, after filtering off the undissolved dye, UV spectra were acquired. Based on the UV data at 335 nm, Corexit could load about twice the amount of guest than the single layer SiO<sub>2</sub>NP-PCL-PEG and 1.6 times as much as the double layer SiO<sub>2</sub>NP-2xPCL-PEG.

The intensity ratio of the two characteristic absorbance peaks at 383 nm and 373 nm ( $I_3/I_1$ ) from uncalibrated fluorescence experiments, also shown in the figure (top), indicate higher loading capabilities of the SiO<sub>2</sub>NP-2xPCL-PEG and Corexit, compared to SiO<sub>2</sub>NP-1xPCL-PEG.



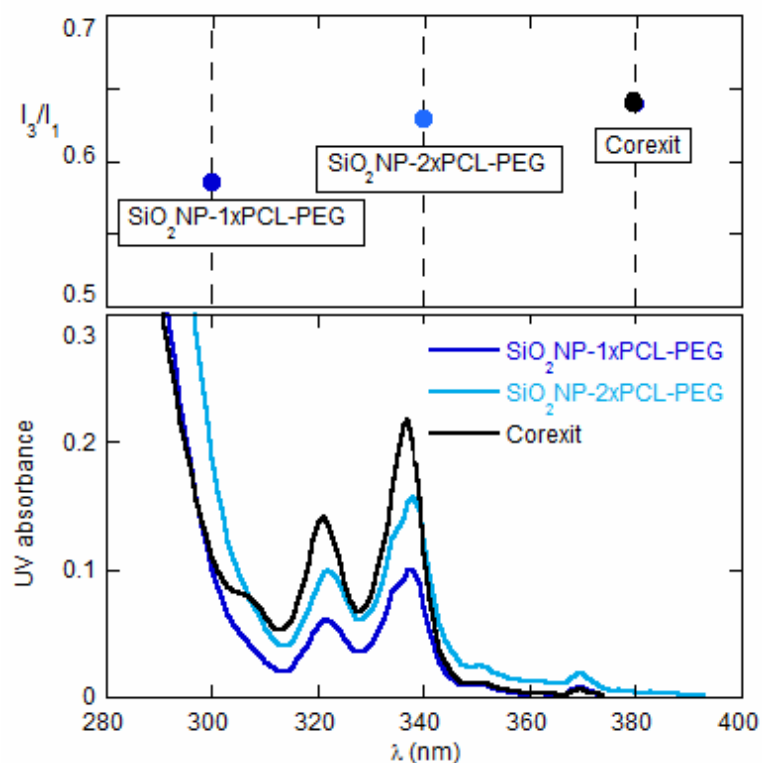

**Figure S17.** Fluorescence emission spectra (top) and UV spectra (bottom) from pyrene encapsulation for  $\text{SiO}_2\text{NP-PCL-PEG}$ ,  $\text{SiO}_2\text{NP-2xPCL-PEG}$ , and Corexit ( $0.1\text{mg mL}^{-1}$ ) in water

Data from the reactant and final product characterization by  $^1\text{H}$  NMR,  $^{13}\text{C}$  NMR and MALDI mass spectra are shown in Figures S18-S21 and Figures S22-S25, respectively.

### Characterization of $\text{HOOC-PEG-OCH}_3$ starting material

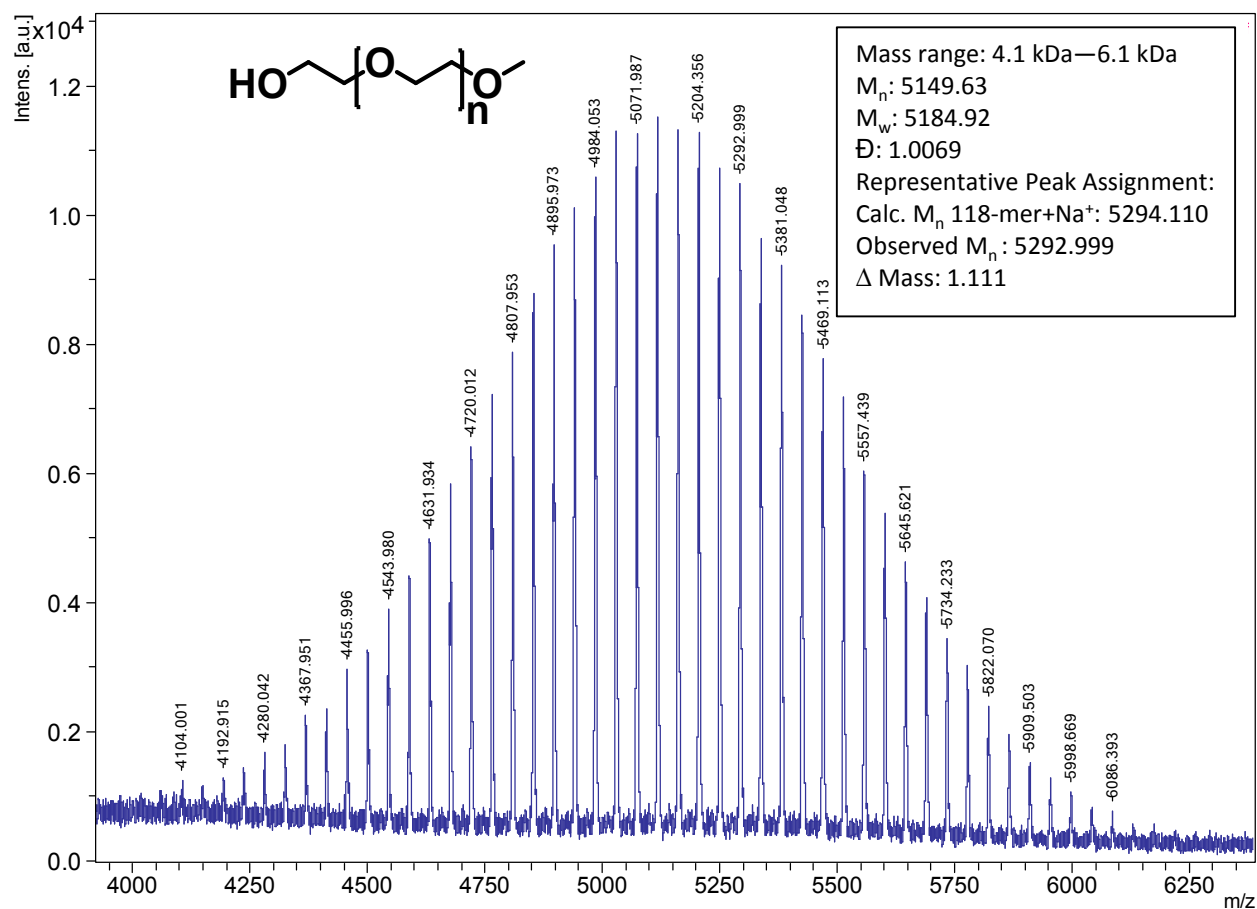

**Figure S18.** MALDI TOF mass spectrum of  $\alpha$ -hydroxy- $\omega$ -methoxy PEG 5000 (MeO-PEG-OH). MS conditions: matrix: *trans*-2-[3-(4-*tert*-butylphenyl)-2-methyl-2-propenylidene]malononitrile (DCTB) 20 mg mL<sup>-1</sup>, analyte: 20 mg mL<sup>-1</sup>, and added cation: sodium trifluoroacetate 2 mg/ mL [3:2:1], calibrated, reflector mode

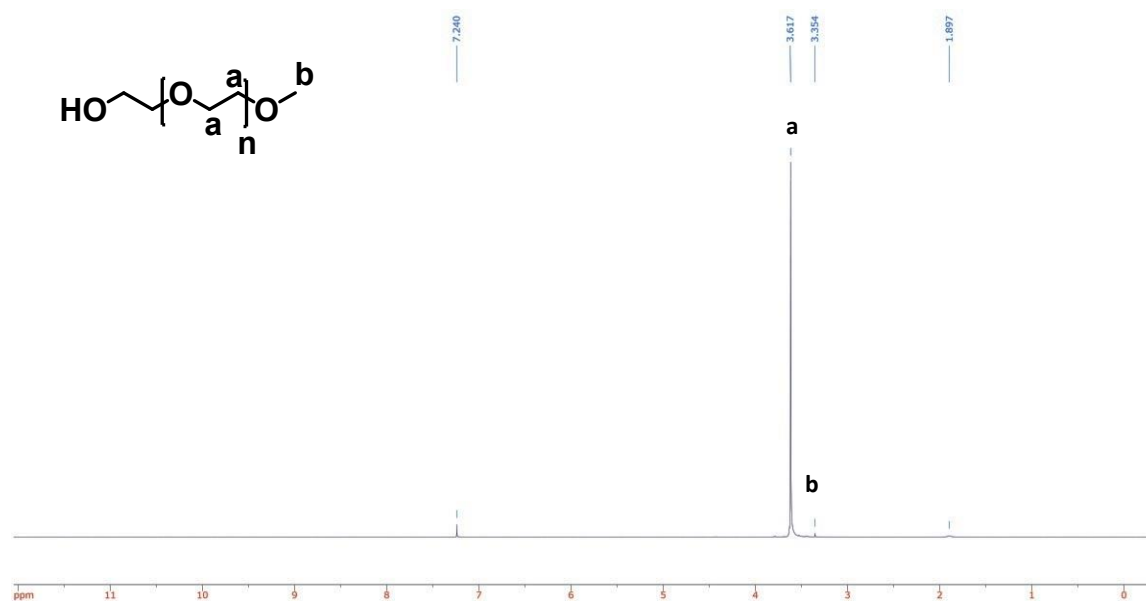

**Figure S19.**  $^1\text{H}$  NMR spectrum in  $\text{CDCl}_3$  of  $\alpha$ -hydroxy- $\omega$ -methoxy PEG 5000 (MeO-PEG-OH) in  $\text{CDCl}_3$

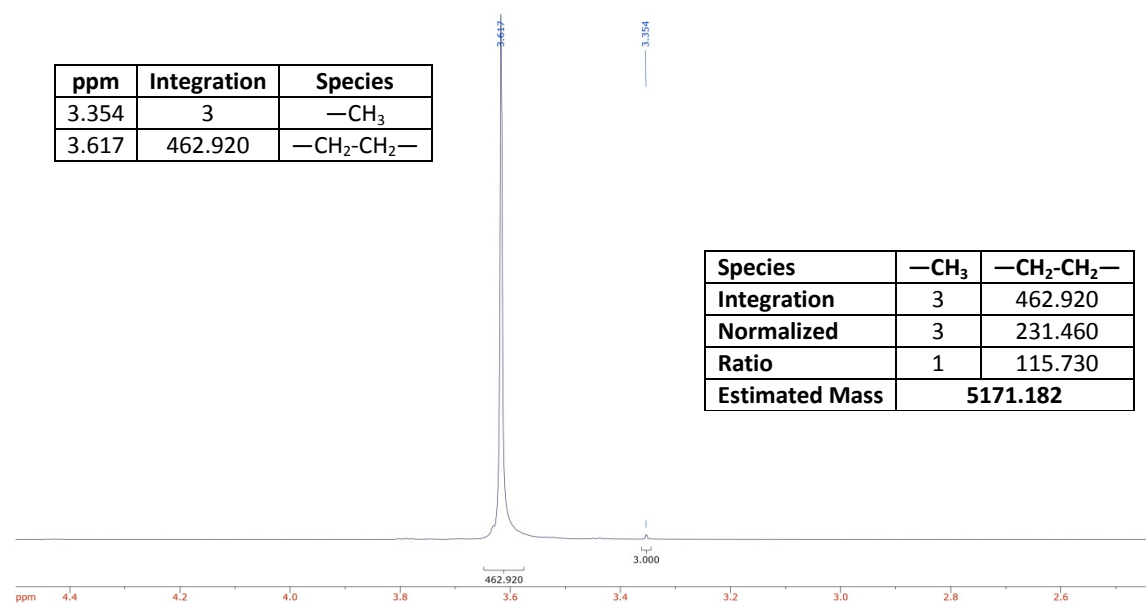

**Figure S20.** Integration of significant peaks from  $^1\text{H}$  NMR spectrum of  $\alpha$ -hydroxy- $\omega$ -methoxy PEG 5000 (MeO-PEG-OH) in  $\text{CDCl}_3$ ; mass calculation

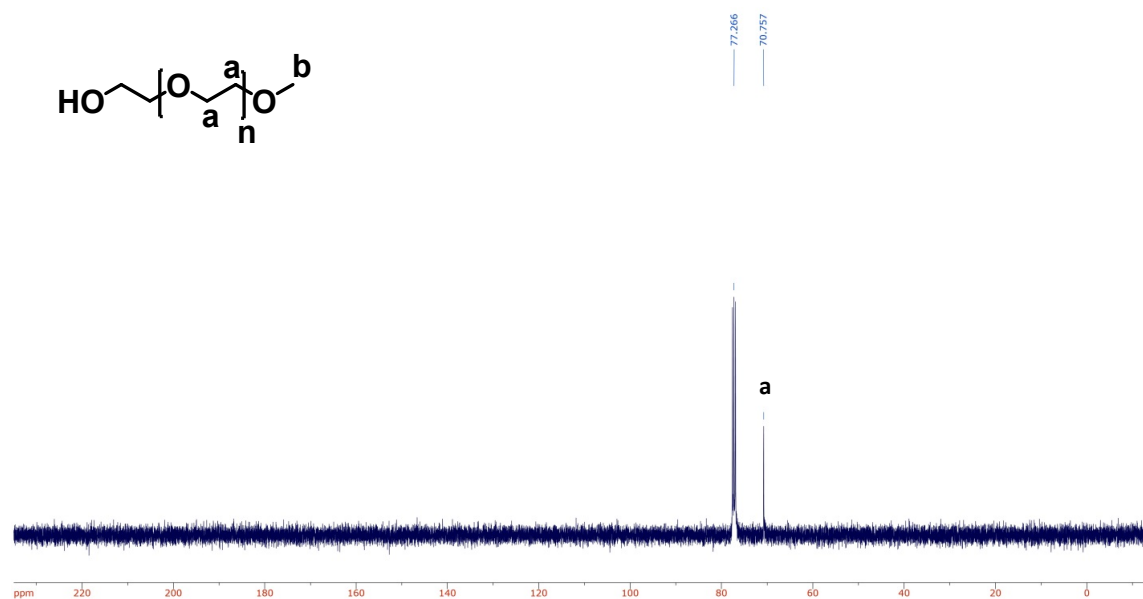

**Figure S21.**  $^{13}\text{C}$  NMR spectrum of  $\alpha$ -hydroxy- $\omega$ -methoxy PEG 5000 (MeO-PEG-OH) in  $\text{CDCl}_3$

### Characterization of $\text{HOOC-PEG-OCH}_3$ product for DCC coupling

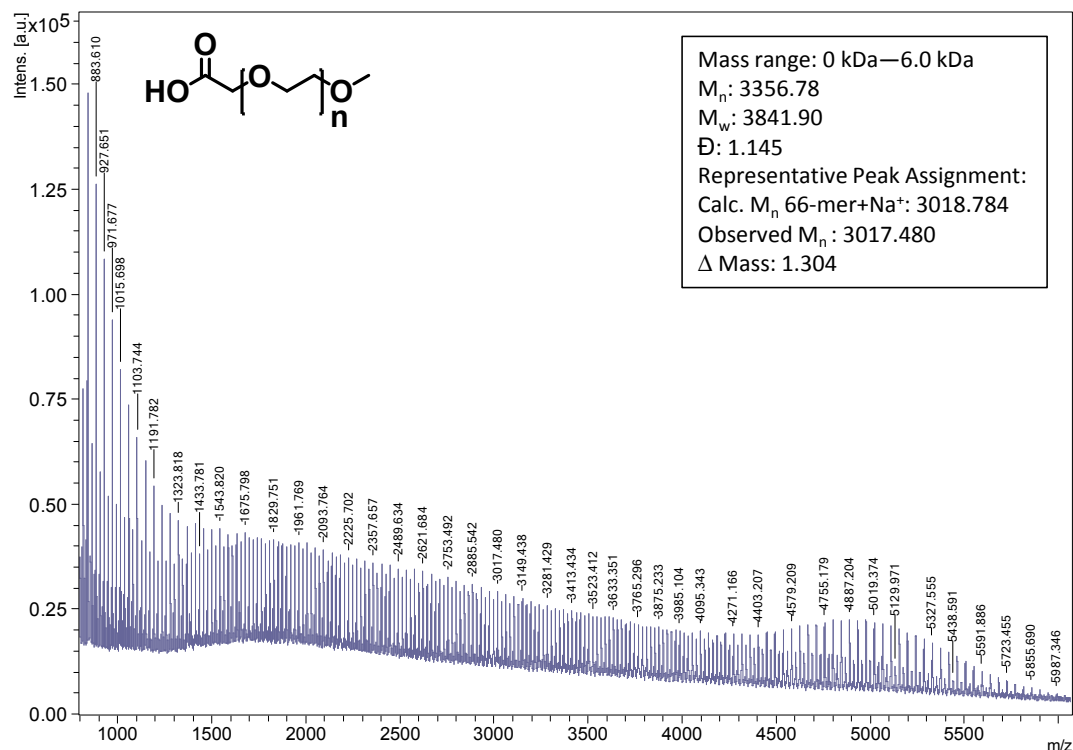

**Figure S22.** MALDI TOF mass spectrum of  $\alpha$ -carboxy- $\omega$ -methoxy PEG 3360 (MeO-PEG-COOH). MS conditions: matrix: *trans*-2-[3-(4-*tert*-butylphenyl)-2-methyl-2-propenylidene]malononitrile (DCTB) 20 mg  $\text{mL}^{-1}$ , analyte: 20 mg/mL, and added cation: sodium trifluoroacetate 2 mg  $\text{mL}^{-1}$  [3:2:1], calibrated, reflector mode.

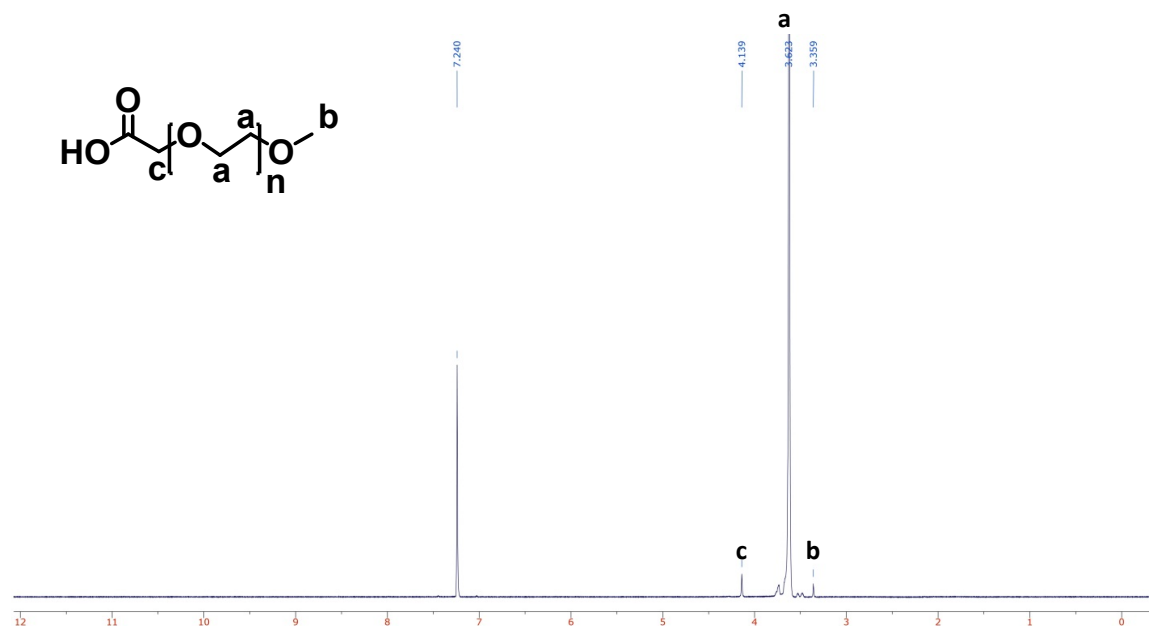

**Figure S23.**  $^1\text{H}$  NMR spectrum of  $\alpha$ -carboxy- $\omega$ -methoxyPEG 3360 (MeO-PEG-COOH) in  $\text{CDCl}_3$

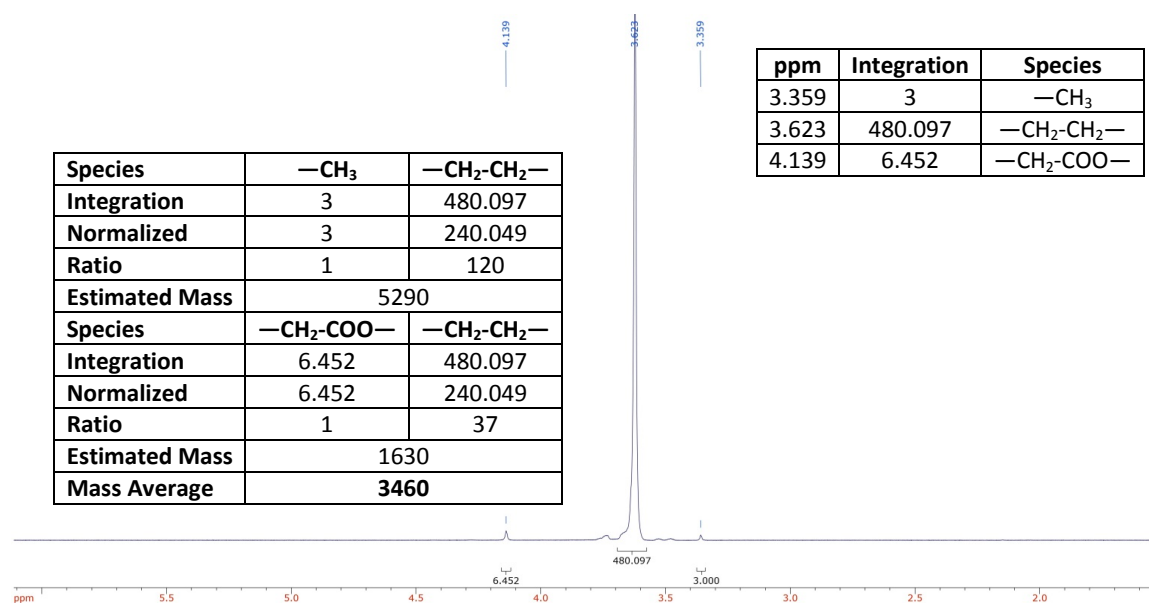

**Figure S24.** Integration of significant peaks from  $^1\text{H}$  NMR spectrum of  $\alpha$ -carboxy- $\omega$ -methoxy PEG 3360 (MeO-PEG-COOH) in  $\text{CDCl}_3$ ; values calculated against methyl and carboxy  $\alpha$ -position hydrogens.

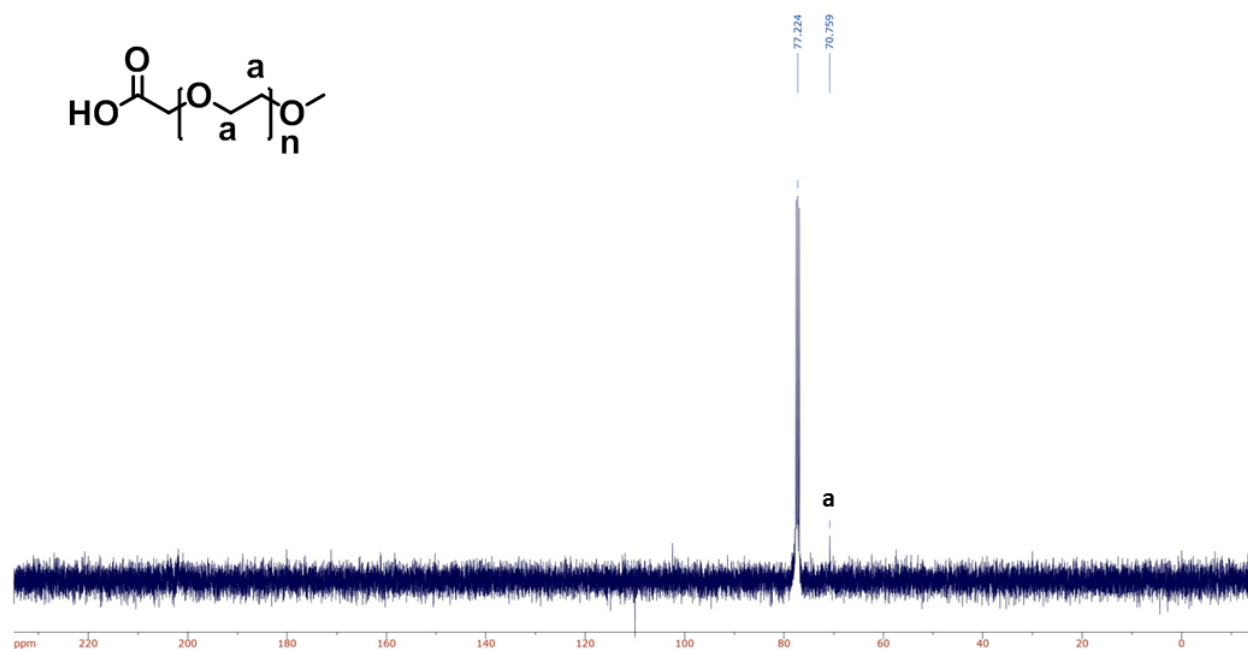

**Figure S25.**  $^{13}\text{C}$  NMR spectrum of  $\alpha$ -carboxy- $\omega$ -methoxy PEG 3360 (MeO-PEG-COOH) in  $\text{CDCl}_3$

Additional raw data are available through: <https://data.gulfresearchinitiative.org/data-discovery>

## References

- <sup>1</sup> G. L. Chakkalakal, M. Alexandre, C. Abetz, A. Boschetti-de-Fierro and V. Abetz, *Macromol. Chem. Phys.* 2012, **213**, 513.
- <sup>2</sup> V. Maurice, C. Slostowski, N. Herlin-Boime and G. Carrot, *Macromol. Chem. Phys.* 2012, **213**, 2498.
- <sup>3</sup> A. M. Alb and W. F. Reed, *Macromol. React. Eng.* 2010, **4**, 470.
- <sup>4</sup> G. A. Sorci and W. F. Reed, *Macromolecules* 2002, **35**, 5218.
- <sup>5</sup> E. Grabowski and I. Morisson in “Particle Size Distributions from Analysis of Quasi-Elastic Light Scattering Data”, chapter 7 in *Measurements of Suspended Particles by Quasi-Elastic Light Scattering*, ed. B Dahneke, Wiley-Interscience, New York, 1983.
- <sup>6</sup> J. Pyun, S. Jia, T. Kowalewski, G. D. Patterson and K. Matyjaszewski, *Macromolecules* 2003, **36**, 5094.
- <sup>7</sup> Y. P. Wang, X. W. Pie, X. Y. He and K. Yuan, *Eur. Polym. J.* 2005, **41**, 1326.
